# Supplementary figures and images for: A novel device to concurrently assess leukocyte extravasation and interstitial migration within a defined 3D environment
Source: Royal Society of Chemistry journal article supplement (doi:10.1039/c4lc00741g), 2014-09-29

## Supplementary Figure-2 (Molteni R. *et al*)

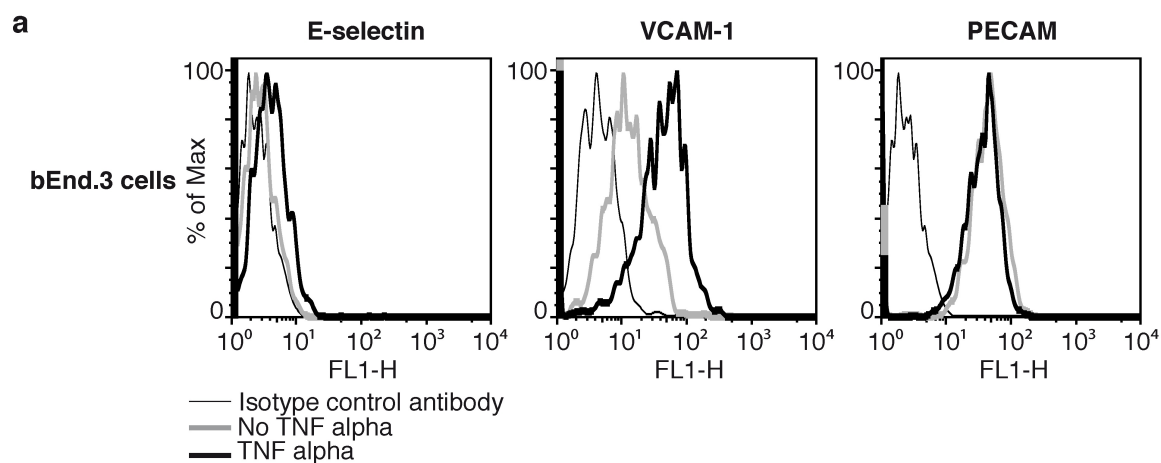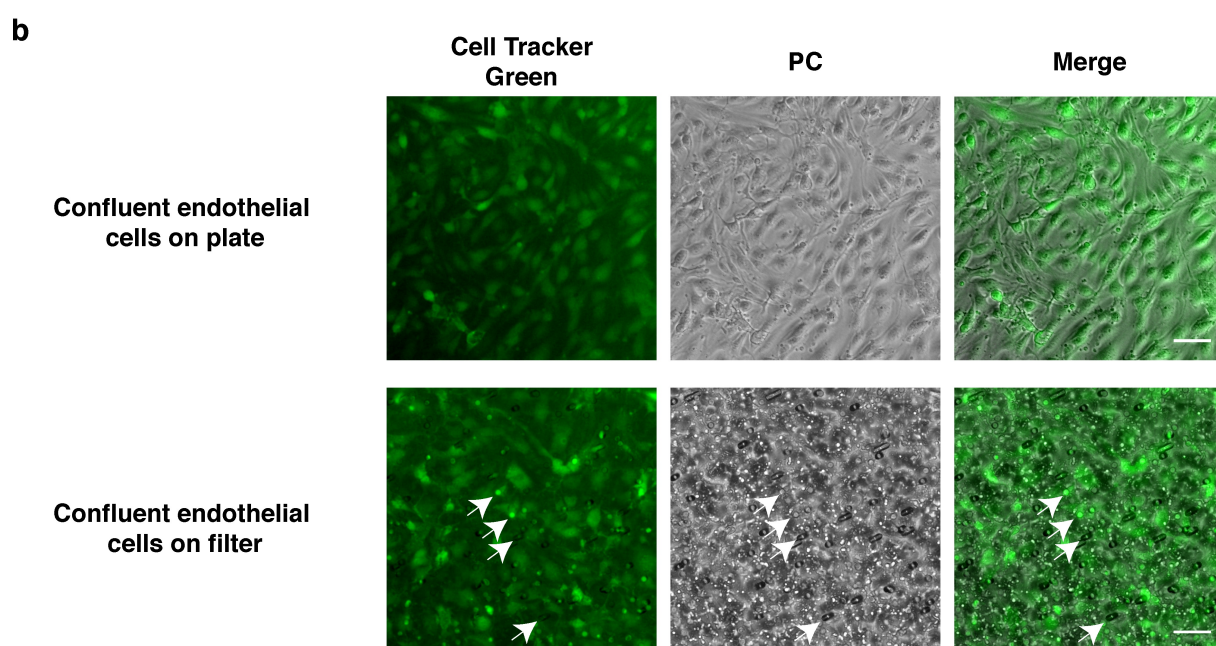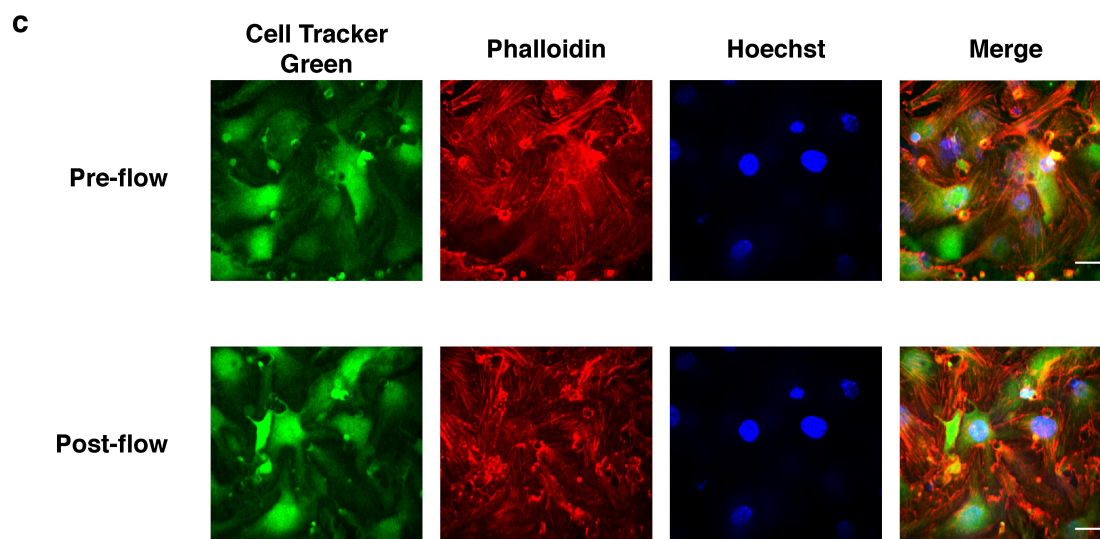

Supplement: c4lc00741g2.pdf [file c4lc00741g2.pdf]

### Supplementary Figure-3 (Molteni R. *et al*)

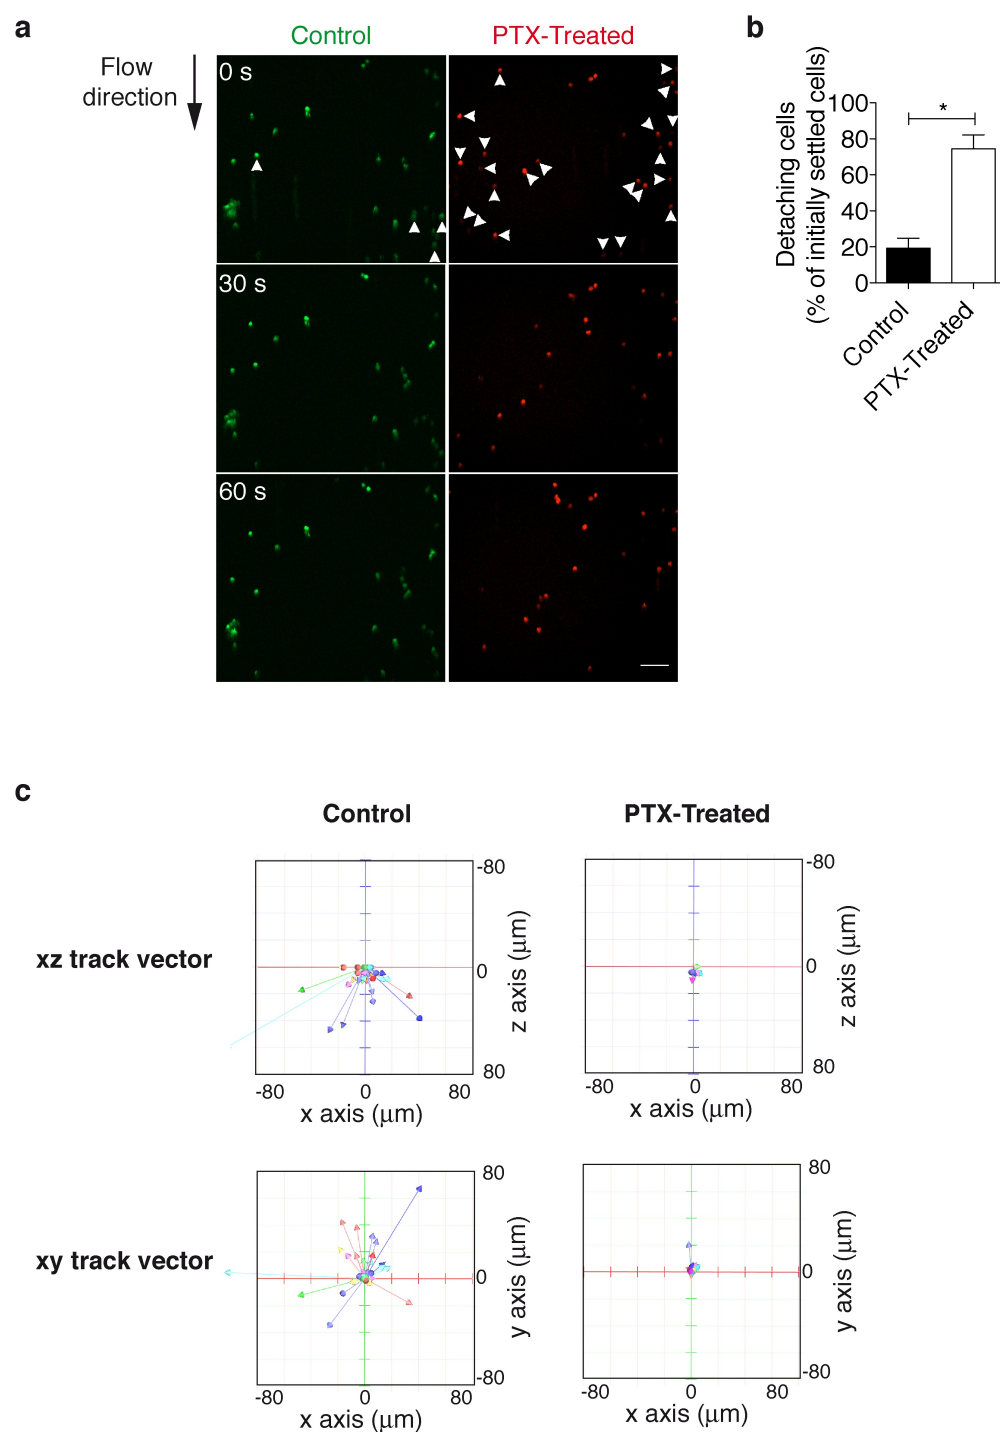

Supplement: c4lc00741g3.pdf [file c4lc00741g3.pdf]
